# Supplementary material for: Sustainable biorefining in wastewater by engineered extreme alkaliphile Bacillus marmarensis
Source: PubMed Central journal article supplement (PMC4735285; doi:10.1038/srep20224), 2016-02-01
Supplement: srep20224-s1.pdf [file srep20224-s1.pdf]

# Sustainable biorefining in wastewater by engineered extreme alkaliphile *Bacillus marmarensis*

## SUPPLEMENTARY INFORMATION

David G. Wernick<sup>1</sup>, Sammy P. Pontrelli<sup>1</sup>, Alexander W. Pollock<sup>1</sup>, James C. Liao<sup>1,2,3,4\*</sup>

### Affiliations

<sup>1</sup>Department of Chemical and Biomolecular Engineering, University of California, Los Angeles, 5531 Boelter Hall, 420 Westwood Plaza, Los Angeles, CA 90095, USA

<sup>2</sup>Department of Chemistry and Biochemistry, University of California, Los Angeles, 607 Charles E. Young Drive East, Los Angeles, CA 90095, USA

<sup>3</sup>UCLA-DOE Institute for Genomics and Proteomics, University of California, Los Angeles, 201 Boyer Hall, 611 Charles E. Young Drive East, Los Angeles, CA 90095, USA

<sup>4</sup>Department of Bioengineering, University of California, Los Angeles, 420 Westwood Plaza, 5121 Engineering V, Los Angeles, CA 90095, USA

\*Corresponding author: James C. Liao, Email: [liaoj@seas.ucla.edu](mailto:liaoj@seas.ucla.edu), Phone: +1-310-8251656, Fax: +1-310-2064107

**Supplementary Figure 1.** Plate assay of *B. marmarensis* contamination resistance. Following propagation on purposefully-contaminated, unsterile *B. marmarensis* cultures, plates were streaked from the mixed cultures and analyzed for growth of contaminants. No major fungal contamination could be discerned. Foreign bacterial colonies observed, but not in great numbers.

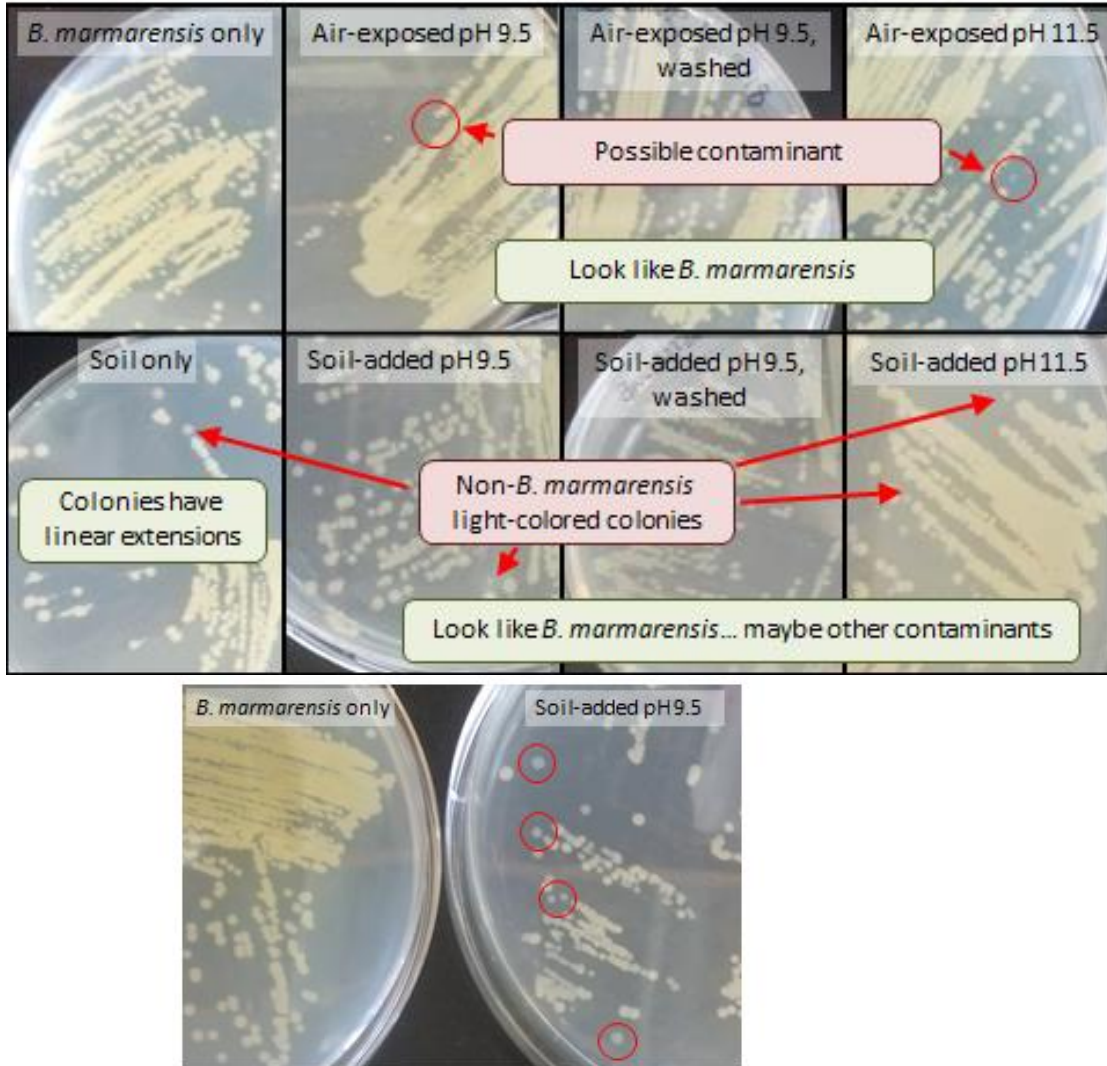

- No major fungal contamination observed.
- Most bacterial colonies in this study look alike, although at least one other species has been identified.
  - Need molecular characterization to study species distributions.

**Supplementary Figure 2.** High-resolution melt analysis of genomic DNA extractions from contaminated-cultures throughout the study. The melt temperature of three hypervariable 16s rDNA regions of each contaminated culture was examined over the study. In the open-air contaminated systems, the melt temperatures either directly match throughout or at the end of the experiment with that found for *B. marmarensis* monocultures. In soil-contaminated cultures, melt temperatures trend towards that of *B. marmarensis* overtime, particularly at pH 11.5. *B. marmarensis* appears to show some dominance of over strains based on its 16s rDNA melting temperatures being matched in this study.

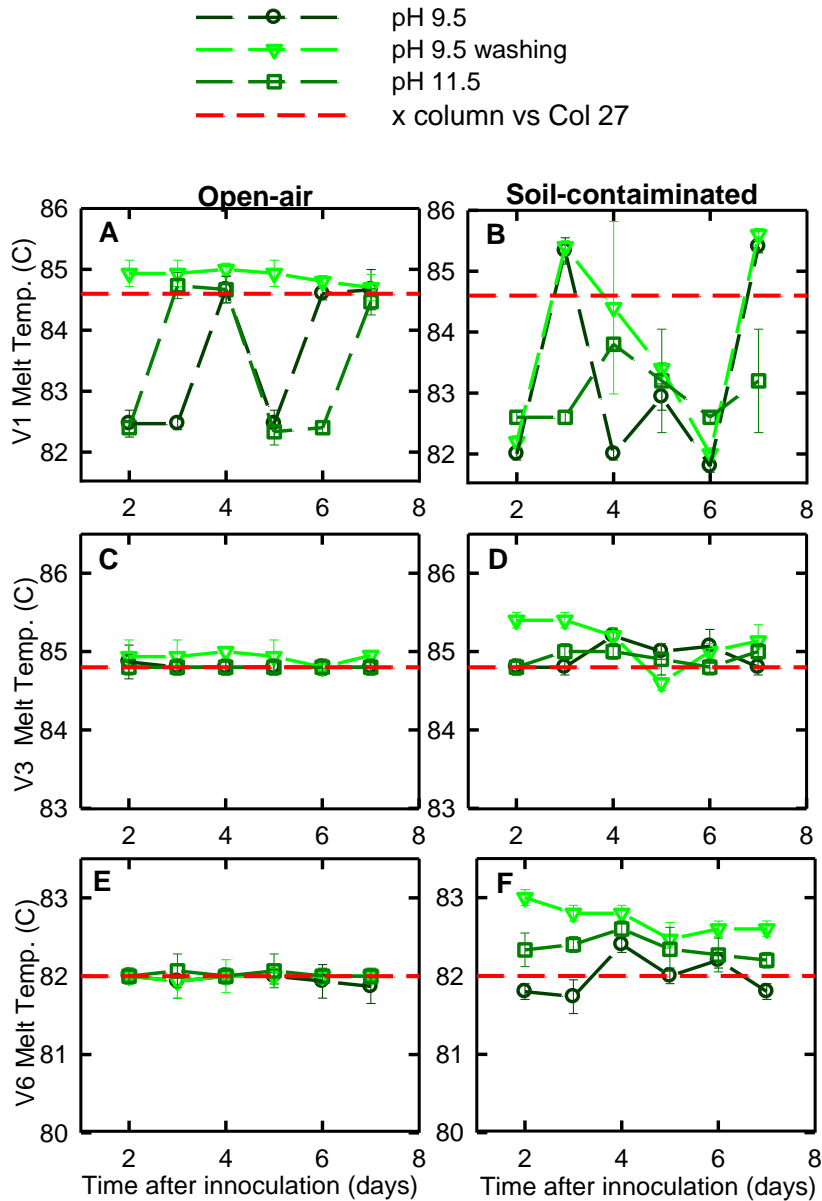

**Supplementary Figure 3.** Species distribution in 16s rDNA library from the round of contamination studies. 16s rDNA library was built on complete genomic DNA extractions from the final cultures, described further in the main text. The complete distribution of all identified species is given here. *B. sp.* represents strains of the genus *Bacillus* that do not have given species names. Unknown strains are reads that did not return exact matches in BLAST searches.

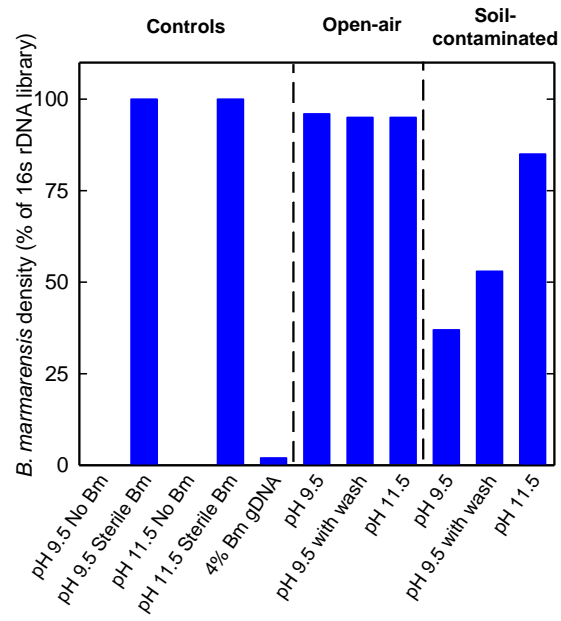

**Supplementary Figure 4.** Process flow of the eletrotransformation procedure for *B. marmarensis*. To achieve high-efficiency transformations several adjustments to protocols for other species were made. This included preheating and pre-aerating the diluent media, minimizing glycine treatment time, using fresh wash buffer, applying a square-wave electric pulse, and not using a very-high osmolarity rescue media.

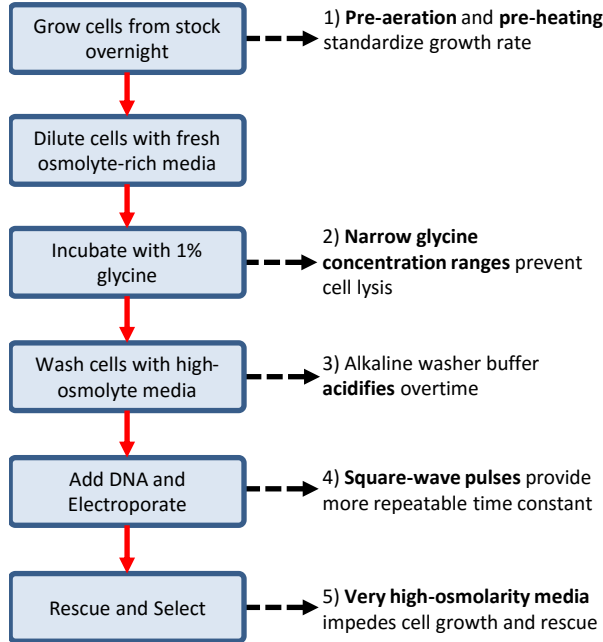

**Supplementary Figure 5.** Genetic transformation details and data. Eletrotransformation of gram-positive bacteria has been achieved using a general flow sheet as shown in Fig. 5, but previously-unobserved modifications were required for transformation of *B. marmarensis*. The major differences in eletrotransformation of gram-positive strains compared to *E. coli* are the use of sugar alcohols as osmotic stabilizers (eg. D-sorbitol and D-mannitol) and cell-wall weakening agents (eg. glycine or lysozyme) that are not employed for gram-negative strains. However, transformation of *B. marmarensis* required several more modifications. (A) First, following overnight growth liquid media, the strain required pre-heating and pre-aeration of the diluent media for regular growth. Irregular and unpredictable cell growth resulted without both preheating and pre-aerating. (B) *B. marmarensis* showed a small window of sensitivity to glycine pretreatments. In *B. marmarensis*, 1 % (w/v) glycine sufficiently weakened cell walls. However, the glycine addition had to be performed with a cell density ( $OD_{600nm}$ ) above 0.35 to avoid cell lysis. (C) Only a very narrow range of glycine concentrations was effective. 0.7 % (w/v) glycine did not inhibit cell-wall synthesis, while 1.3% led to significant loss of cell density. This working range of less than 0.6 % (w/v) is significantly smaller than prior transformation protocols. Third, the wash buffer containing glycerol, 0.5 M D-sorbitol, 0.5 M D-mannitol had to be raised to an alkaline pH with minimal addition of base. Excess base would increase the salt concentration and electrical conductivity to lower the overall efficiency of electroporation. (D) As this has not been an issue in previous eletrotransformation protocols, prior research has not shown the acidification of wash buffers. Assembly of fresh wash media bypasses this issue. (E) Although not unique to only *B. marmarensis*, square-wave electric pulses and minimal osmotic stabilizers in the rescue media raised the number of successful transformants. (F) Combining all changes, eletrotransformations reached efficiencies on the order of  $1 \times 10^5$  transformants per  $\mu g$  heterologous DNA. (G) and (H) Colony PCRs and plasmid purifications verified successful transformation and maintenance of plasmids. (ON FOLLOWING PAGE).

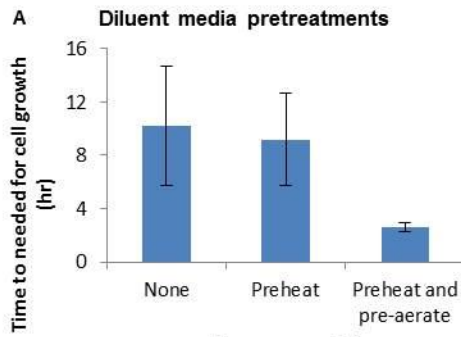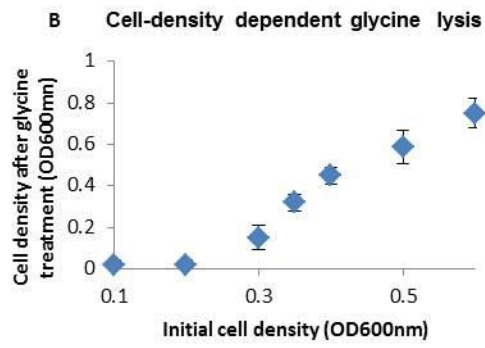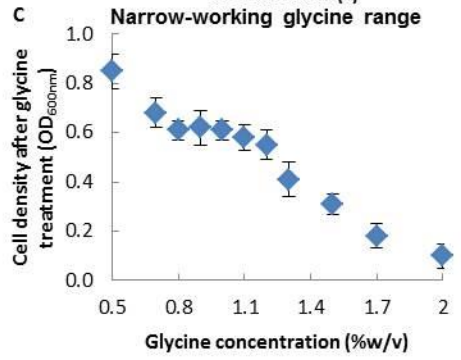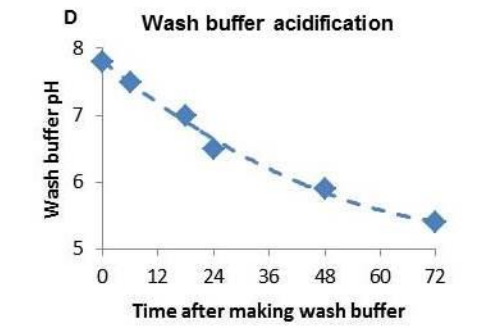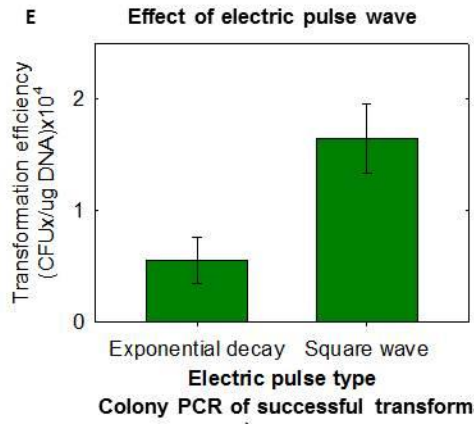

**F Selective plate with >1x10<sup>5</sup> CFU/ug DNA**

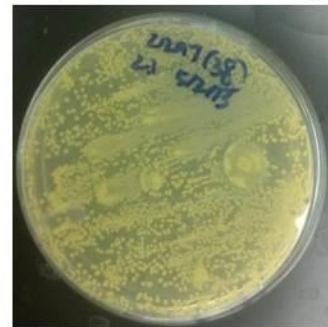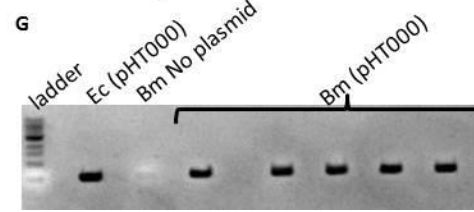

**H Miniprep of transformants**

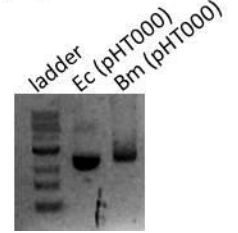

**Supplementary Figure 6.** Demonstration of plasmid replication and integrity in *B. marmarensis*. (A) Colony PCR confirms the presence of gene transformed into *B. marmarensis* on plasmid pDGW38. (B) Miniprep of plasmids transformed into *B. marmarensis* shows intact plasmid, although yield was much lower than that from *E. coli*.

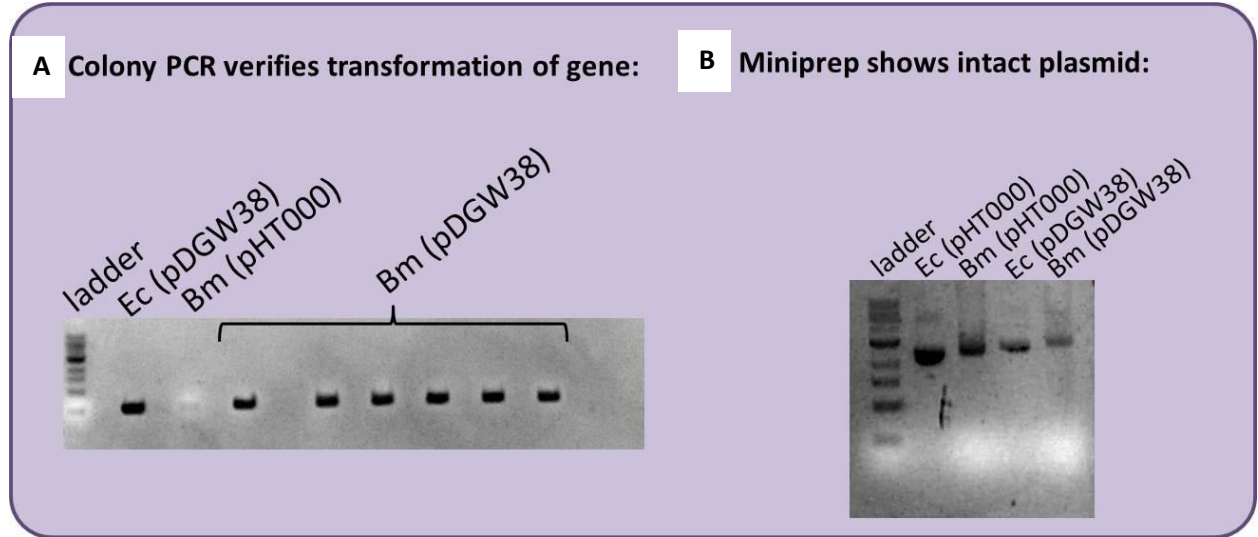



**Supplementary Figure 7.** Lactate dehydrogenase (LDH) activity in *B. marmarensis* with and without antisense knockdown. (A) Antisense knockdown construct setup. (B) Knockdown of *ldh* activity displayed in strain expressing antisense sequence.

## Antisense knockdown setup

**A**

- **Antisense knockdown in prokaryotes:** Transcribe **reverse-complementary RNA sequence** that will bind mRNA of target gene and **prevent translation (block RBS + first few codons)**.  
16s RNA ACCTCCTTT (aaaggaggt)

- *ldh* promoter, RBSs, and ORF beginning Promoter
- ```
gaacgtaaataagttgctgttatgacttgatttagtttctggttttatttaaataattatcgagtccttcttggtcatctaa
gtaggtgtcaattcggttacgatttgacaccccatccaagaaggctcctttttacattatgtttgaaatgtttcac
aagttagacgtaactatttatgaagtggtagatttagacatttttaacatagactaagggggagttaagggatatt
acgaggaggtatgacaATGAAAGTTTCATTATT...
```

RBS 3                      ORF                      RBS 1                      RBS 2

- Antisense construct: Promoter
- ```
gaacgtaaataagttgctgttatgacttgatttagtttctggttttatttaaataattatcgagtccttcttggtcatctaa
gtaggtgtcaattcggttacgatttgacaccccatccaagaaggctcctttttacattatgtttgaaatgtttcac
aagttagacgtaactatttatgaagtggtagatttagacatttttaacatagactaagggggagttaagggatatt
acgaggaggtatgacaATGAAAGTTTCATTATT...
```

Reverse complement of Antisense RNA

**B**

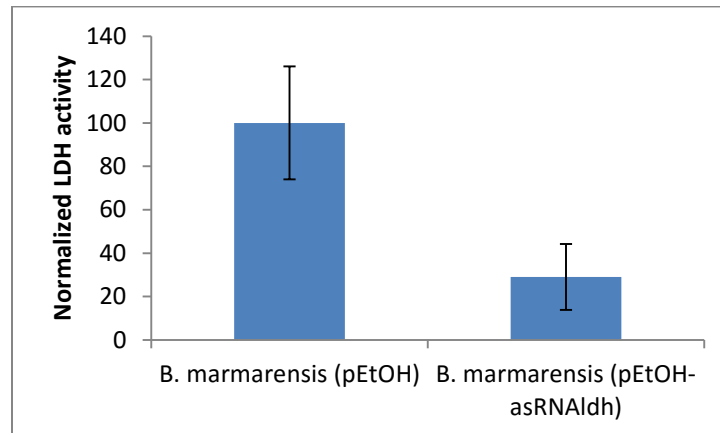

**Supplementary Figure 8.** *B. marmarensis* cell mass was re-cycled for additional ethanol production. Yields showed slight drops in successive batches, but overall produced a cumulative titer of 37 g/l at 55% the theoretical maximum.

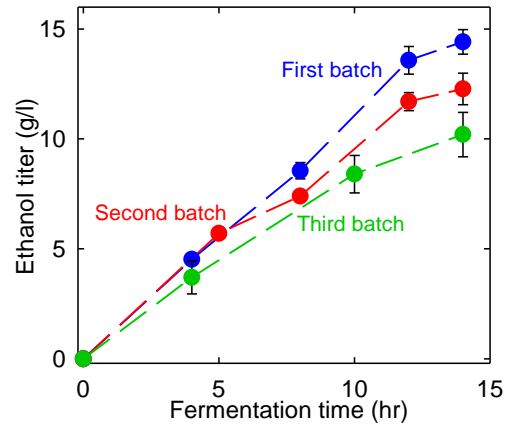

**Supplementary Figure 9:** Supporting fermentation data for ethanol yield calculations from glucose. Glucose consumption through fermentation of *B. marmarensis* harboring plasmids (A) pEtOH, (B) pEtOH-asRNA, (C) pEtOH-asRNA156. (D) and (E) Fermentations with *B. marmarensis* (pEtOH-asRNA156) with extra glucose and salts. (F) Pyruvate decarboxylase (PDC) and alcohol dehydrogenase (ADH) activity assays in *B. marmarensis* WT, (pEtOH), and (pEtOH-asRNA).

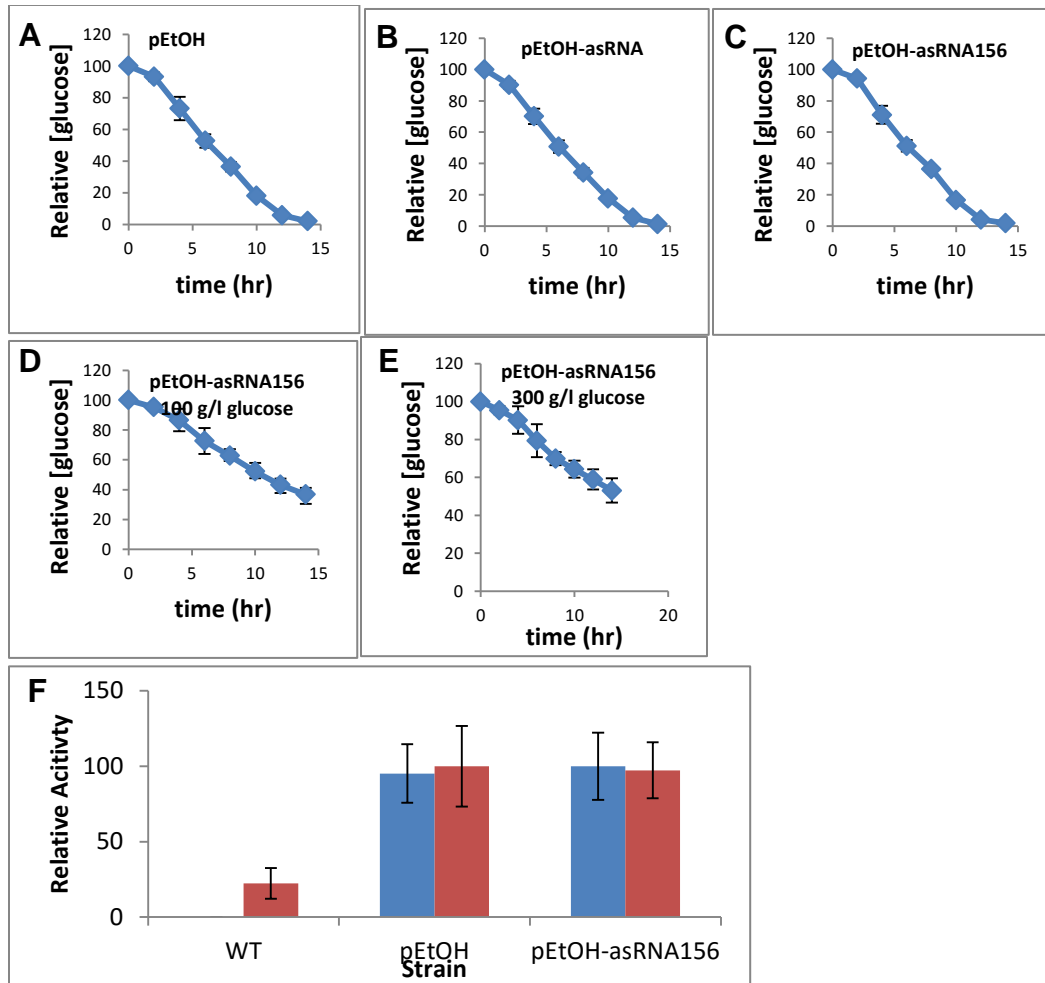

**Supplementary Figure 10:** Supporting fermentation data for ethanol for yield calculations from cellobiose and xylose. Carbohydrate consumption in fermentations of (A) cellobiose, (B) xylose, and (C) cellobiose and xylose. (D) Ethanol titers from cellobiose, xylose, and cellobiose/xylose mixtures with contaminated conditions.

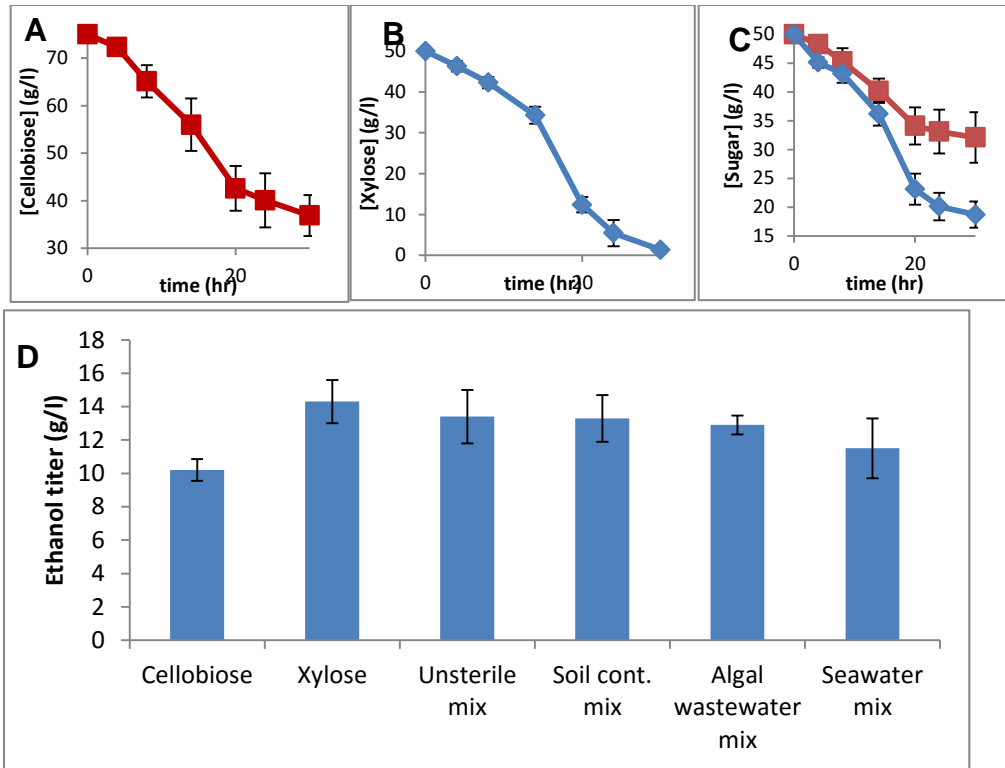

**Supplementary Table 1.** Primers and genes for *B. marmarensis* promoter library

| <b>RAST#</b> | <b>Gene</b> | <b>Forward/reverse primer</b>                                                                                         |
|--------------|-------------|-----------------------------------------------------------------------------------------------------------------------|
| 14           | CdpS        | cagctatgaccatgattacgcctaagtaaactgcatatcctgttacgag<br>TTAGGAAATTGGATAATAGTCATCTC ATG ACC TCC CTT CAG GTG A             |
| 23           | CTPs        | cagctatgaccatgattacgccAGA GGA CGA GCT AGA TGA AAT CTC<br>TTAGGAAATTGGATAATAGTCATGCG ATC GAC TCC TCT ACT TTT CAT C     |
| 31           | Rrna        | cagctatgaccatgattacgccCAG TTA GAC AAG CTA TGG GCG ATC C<br>TTAGGAAATTGGATAATAGTCATTGA TTT CAT CTC CTT CCG CCC TGA ATC |
| 44           | R5P Iso     | cagctatgaccatgattacgccttacagcaatggcagagcaaca<br>TTAGGAAATTGGATAATAGTCATctgtacaacctcctaaatggtttaagaaaag                |
| 50           | atpI        | cagctatgaccatgattacgccccaacgcgattgtaagagcaacc<br>TTAGGAAATTGGATAATAGTCATgaacaccgctcccctcaag                           |
| 59           | atpE        | cagctatgaccatgattacgccTGCATCAACATCTCGTGCCTT<br>TTAGGAAATTGGATAATAGTCATGTGAGAAACCTCCTCGAGTAGC                          |
| 123          | aap         | cagctatgaccatgattacgccTCCAATGGTTTGGGTTTGAGAA<br>TTAGGAAATTGGATAATAGTCATCCACACCCTCCTTCTTCTGATTC                        |
| 152          | DHPs        | cagctatgaccatgattacgccCGCGCGTAACTAAGCAGAT<br>TTAGGAAATTGGATAATAGTCATCTTATACCACCCCAACCAGTAATAG                         |
| 440          | murE        | cagctatgaccatgattacgccAAAGTCGATGCGACAGGAGAAG<br>TTAGGAAATTGGATAATAGTCATGTTTAAACCCTCACATTCAAACCTTTTTT                  |
| 442          | mraY        | cagctatgaccatgattacgccAAGCTTACTGGCAGCAAAGGTG<br>TTAGGAAATTGGATAATAGTCATTGCTAATCATTCTCCTTCTTTTTG                       |
| 443          | murD        | cagctatgaccatgattacgccTTTTGGTGCCTTGTATTTTTG<br>TTAGGAAATTGGATAATAGTCATGTATGTTTACACCTCATTTACATCCATACC                  |
| 569          | comk        | cagctatgaccatgattacgccccggatttccagtatggcttg<br>TTAGGAAATTGGATAATAGTCATagggaaatcgctccttagtga                           |
| 577          | S-layer     | cagctatgaccatgattacgccTCGTCGATTTTTGACGAAATTG<br>TTAGGAAATTGGATAATAGTCATAAGTATAATTCCTCCTTCAAATTTGC                     |
| 588          | 5Nuc        | cagctatgaccatgattacgccTGAGCAAAGTCCAAGCAGTAA<br>TTAGGAAATTGGATAATAGTCATCATATTCCTCCTAGAAATCTATTTTCACTTAG                |
| 595          | s-layer     | cagctatgaccatgattacgccACCCATGATTGCCAGCTTATGA<br>TTAGGAAATTGGATAATAGTCATGATCATTCTCCTACAAAATAGTCACATTC                  |
| 891          | sigB        | cagctatgaccatgattacgccaattgccaatgccttgat<br>TTAGGAAATTGGATAATAGTCATttttctccacctcatctccgca                             |
| 1045         | GDH         | cagctatgaccatgattacgccGCCTGATTCATCCGCTCTAA<br>TTAGGAAATTGGATAATAGTCATTTCAATCTCCCCAATATCG                              |
| 1361         | s-layer     | cagctatgaccatgattacgccCTTGTTTCGGGTGACGATAC<br>TTAGGAAATTGGATAATAGTCATAAGATAACCTCCAATATGGTAGAAAATAGT                   |
| 1486         | BCAAtr      | cagctatgaccatgattacgccGCTTGATGAAGCAGCAAAGGTT<br>TTAGGAAATTGGATAATAGTCATCACTACTCCTCCTCAACATAATCTACG                    |
| 1502         | tns-cdd     | cagctatgaccatgattacgccccggtattactgcctgtt<br>TTAGGAAATTGGATAATAGTCATttaaagaggatctcctctcctgattgc                        |
| 1503         | cdd         | cagctatgaccatgattacgccccgagaagtccagcggtta<br>TTAGGAAATTGGATAATAGTCATtgttctcgtccccttctaatggtcc                         |
| 1513         | rpoD        | cagctatgaccatgattacgccccatcatgcccattgcagctt<br>TTAGGAAATTGGATAATAGTCATtcatccccctcttcattgt                             |
| 2070         | Alk         | cagctatgaccatgattacgccCAT AGG CAT TTG TCT GCA AAG GCC                                                                 |

|      |         |                                                                                                                                                              |
|------|---------|--------------------------------------------------------------------------------------------------------------------------------------------------------------|
| 2126 | GDH     | TTAGGAAATTGGATAATAGTCATGAT ACA TAC ATA AGG AGG GTG AGA CCT A<br>cagctatgaccatgattacgccATATGCACCGGATGGAATGAAC<br>TTAGGAAATTGGATAATAGTCATATTATCCCCTCCCAAATCTGC |
| 2168 | GS      | cagctatgaccatgattacgccGCGAGAAGCTGTTGCTAGTG<br>TTAGGAAATTGGATAATAGTCATCATCCAATTCTTTTCATAAAGTAT                                                                |
| 2196 | GaPAT   | cagctatgaccatgattacgccAACGGCTGTTCTAAGCGAGTACG<br>TTAGGAAATTGGATAATAGTCATGGTTTCCCCCAAGTGTTC                                                                   |
| 2804 | GDH     | cagctatgaccatgattacgccCACCTCGTGAAAACTCGT<br>TTAGGAAATTGGATAATAGTCATCTTCTACCCCGCCAATA                                                                         |
| 2910 | GS      | cagctatgaccatgattacgccAATGATGGCAGGAAGAAACG<br>TTAGGAAATTGGATAATAGTCATTGTTATGTATTCCCCTTCAAATTCT                                                               |
| 3351 | sig70   | cagctatgaccatgattacgcctactggggcaggcaacgta<br>TTAGGAAATTGGATAATAGTCATtgcgactacccccgaagttg                                                                     |
| 3358 | GDH     | cagctatgaccatgattacgccATGACGCCAACAAGCCTCTAT<br>TTAGGAAATTGGATAATAGTCATCTGTTTACCTCTAGCCAGTGTTT                                                                |
| 3793 | IlvE    | cagctatgaccatgattacgccCGGCAGCTATTCTCGTTTTT<br>TTAGGAAATTGGATAATAGTCATGTTGCCAAGCTCGTTTTACA                                                                    |
| 3856 | malDH   | cagctatgaccatgattacgccTGCACAAGTTGGCGGTATTG<br>TTAGGAAATTGGATAATAGTCATCTTCATCAACTCCCAGTTATGATAGTGA                                                            |
| 3858 | cit syn | cagctatgaccatgattacgccATGCGTGGATTGCATTAGCC<br>TTAGGAAATTGGATAATAGTCATGTTAATCTCTCTTTTCCCTAATTATCTTTTT                                                         |

---

**Supplementary Table 2.** Primers to clone pHTetOH series plasmids

---

|                  |                                                              |
|------------------|--------------------------------------------------------------|
| pHT backbone     | AGCAGCATCCGGATAGAGGCTTGTTGGCGTCATttgatatgcctcctaaatTTTTtcta  |
| pHT backbone     | TAACAAGCTCCTCTAGTAAGGAGGAACTACTATGAACTTTAATAAAAATTGATTAGACAA |
| P3358            | tttagataaaaatttaggagcatatcaaATGACGCCAACCAAGCCTCTAT           |
| P3358            | GAAAGGAATATAAAAAGTTGAAGAAGCCATCTGTTTCACCTCTAGCCAGTGT         |
| adhA (Zm)        | ATACATCGAACACTGGCTAGAGGTGAAACAGATGGCTTCTTCAACTTTTTATATTCCTTT |
| adhA (Zm)        | TACATTTTTGTATCGTCAACCGAACCAAGTTAGAAAGCGCTCAGGAAGAGT          |
| P1361            | GTTGAAGAACTCTTCTGAGCGCTTTCTAACTTGTTTCGGGTGACGATACA           |
| P1361            | GCTAAATAGGTACCGACAGTATAACTCATAAGATAACCTCCAATATGGTAGAAAATAG   |
| pdh (Zm)         | ACTATTTTCTACCATATTGGAGGTTATCTTATGAGTTATACTGTCCGTACCTATTT     |
| pdh (Zm)         | aatcaatTTtattaaagttcatagtagttcctcctaCTAGAGGAGCTTGTTAACAGGC   |
| phtET2 amplify   | cccTAAAGTAATTACATTAATGACGCCAACCAAGCCTCTA                     |
| phtET2 amplify   | aatcaagtacataacagacaactatttacgttgatagcctcctaaatTTTTtcta      |
| Pldh w/o rbs     | aaattaggagcatatcaacgtaaataagttgtctgttatgact                  |
| Pldh w/o rbs     | AAATCACGGAAAAGCttagctctatgttaaaaaatgtctaaaatct               |
| asRNA            | catttttaacatagactaaGCTTTTCCGTGATTTAGATCG                     |
| asRNA            | GGCGTCATTAATGTAATTACTTTTAgggggagttaaggatatttac               |
| pHtetOH amplify  | ggatatttacgaggaggtatgacAATGAGTTATACTGTCCGTACCTATTT           |
| pHtetOH amplify  | ggagctctaactcgctaacaacctTTAGAAAGCGCTCAGGAAG                  |
| Pldh             | AGAACTCTTCTGAGCGCTTTCTAAgaggttgtagcgagtagag                  |
| Pldh             | AATAGGTACCGACAGTATAACTCATTgtcatacctcctcgtaaatc               |
| pHTetOH45/98/156 |                                                              |
| part1 rev        | gaaagaacatgtgagcaaaaaggcca                                   |
| pHTetOH45/98/156 |                                                              |
| part2 fwd        | tggcctttgctcacatgttctttc                                     |
| pHTetOH45 part1  | ACCATAAAAAAGAAAACAAAGAAGGAGGGTAAATATGAGTTATACTGTCCGTACCTATT  |
| fwd              | T                                                            |
| pHTetOH45 part2  |                                                              |
| rev              | CCTCCTCTTTGTTTTCTTTTTTATGGTAGAAAATAGTTTAATAGATAGATATTACTAGT  |
| pHTetOH98 part1  | ATACGTAAGTAAGAAAACACGAAGGAGGGAAGTTATGAGTTATACTGTCCGTACCTATT  |
| fwd              | T                                                            |
| pHTetOH98 part2  |                                                              |
| rev              | ACTAGTAATATCTATCTATTAAACTATTTTCTACCATACGTAAGTAAGAAAACACGAAGG |
| pHTetOH156 part1 | TAAATTTAATAACACAGAAGAAGGAGGTAGAAAATGAGTTATACTGTCCGTACCTATT   |
| fwd              | T                                                            |
| pHTetOH156 part2 |                                                              |
| rev              | ACTAGTAATATCTATCTATTAAACTATTTTCTACCATAAATTTAATAACACAGAAGAAG  |

---
